# Supplementary material for: Polymorphism and tautomerism in [dienH2][Co(dien)2][Ge2S6] leading to different hydrogen bonded networks
Source: Royal Society of Chemistry journal article supplement (doi:10.1039/c4ce00312h), 2014-05-02
Supplement: c4ce00312h1.pdf [file c4ce00312h1.pdf]

## Supplementary Information

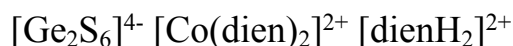

J. Lichte, C. Näther, W. Bensch

### Content

|            |                                                                                                                                                 |    |
|------------|-------------------------------------------------------------------------------------------------------------------------------------------------|----|
| Figure S1. | Part of the crystal structure of compound <b>1</b> with labeling and displacement ellipsoids drawn at the 50% probability level.                | 2  |
| Table S1.  | Selected bond lengths [ $\text{\AA}$ ] and angles [ $^\circ$ ] for compound <b>1</b> .                                                          | 3  |
| Table S2.  | Hydrogen bonds with $\text{H}\cdots\text{A} < r(\text{A}) + 2.000$ Angstroms and $\langle\text{DHA}\rangle > 140^\circ$ for compound <b>1</b> . | 4  |
| Figure S2. | Part of the crystal structure of compound <b>2</b> with labeling and displacement ellipsoids drawn at the 50% probability level.                | 9  |
| Table S3.  | Selected bond lengths [ $\text{\AA}$ ] and angles [ $^\circ$ ] for compound <b>2</b> .                                                          | 10 |
| Table S4.  | Hydrogen bonds with $\text{H}\cdots\text{A} < r(\text{A}) + 2.000$ Angstroms and $\langle\text{DHA}\rangle > 140^\circ$ for compound <b>2</b> . | 10 |
| Figure S3. | Part of the crystal structure of compound <b>2</b> with labeling and displacement ellipsoids drawn at the 50% probability level.                | 5  |
| Table S5.  | Selected bond lengths [ $\text{\AA}$ ] and angles [ $^\circ$ ] for compound <b>3</b> .                                                          | 6  |
| Table S6.  | Hydrogen bonds with $\text{H}\cdots\text{A} < r(\text{A}) + 2.000$ Angstroms and $\langle\text{DHA}\rangle > 140^\circ$ for compound <b>3</b> . | 6  |
| Figure S4. | Part of the crystal structure of compound <b>4</b> with labeling and displacement ellipsoids drawn at the 50% probability level.                | 7  |
| Table S7.  | Selected bond lengths [ $\text{\AA}$ ] and angles [ $^\circ$ ] for compound <b>4</b> .                                                          | 7  |
| Table S8.  | Hydrogen bonds with $\text{H}\cdots\text{A} < r(\text{A}) + 2.000$ Angstroms and $\langle\text{DHA}\rangle > 140^\circ$ for compound <b>4</b> . | 8  |

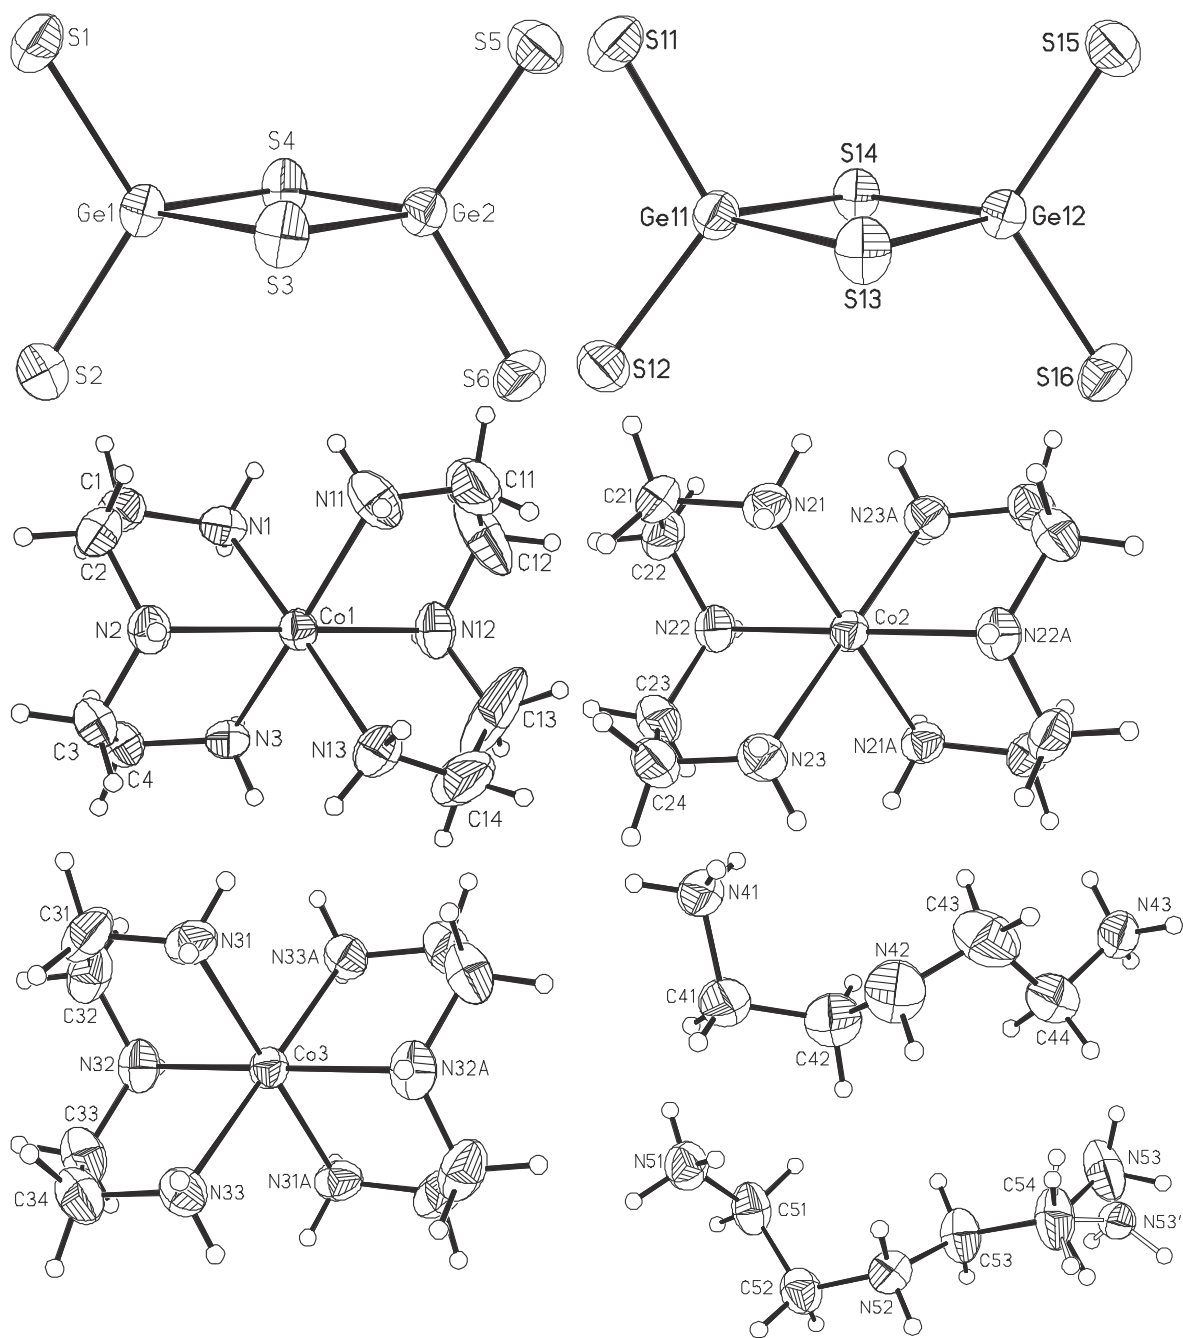

**Figure S1.** Part of the crystal structure of compound **1** with labeling and displacement ellipsoids drawn at the 50% probability level.

**Table S1.** Selected bond lengths [Å] and angles [°] for compound 1. Symmetry transformations used to generate equivalent atoms: #1 -x+1,-y+1,-z+1 #2 -x+1,-y,-z+1

|                       |            |                       |            |
|-----------------------|------------|-----------------------|------------|
| Ge(1)-S(1)            | 2.1521(10) | Ge(11)-S(11)          | 2.1556(9)  |
| Ge(1)-S(2)            | 2.1559(9)  | Ge(11)-S(12)          | 2.1568(9)  |
| Ge(1)-S(4)            | 2.2658(9)  | Ge(11)-S(13)          | 2.2697(9)  |
| Ge(1)-S(3)            | 2.2862(9)  | Ge(11)-S(14)          | 2.2762(8)  |
| Ge(2)-S(6)            | 2.1569(9)  | Ge(12)-S(15)          | 2.1554(9)  |
| Ge(2)-S(5)            | 2.1643(9)  | Ge(12)-S(16)          | 2.1576(9)  |
| Ge(2)-S(4)            | 2.2701(9)  | Ge(12)-S(14)          | 2.2740(9)  |
| Ge(2)-S(3)            | 2.2727(8)  | Ge(12)-S(13)          | 2.2858(9)  |
| S(1)-Ge(1)-S(2)       | 116.67(4)  | S(11)-Ge(11)-S(12)    | 114.38(4)  |
| S(1)-Ge(1)-S(4)       | 112.55(4)  | S(11)-Ge(11)-S(13)    | 112.70(4)  |
| S(2)-Ge(1)-S(4)       | 112.73(4)  | S(12)-Ge(11)-S(13)    | 113.56(3)  |
| S(1)-Ge(1)-S(3)       | 107.70(4)  | S(11)-Ge(11)-S(14)    | 108.97(4)  |
| S(2)-Ge(1)-S(3)       | 111.17(4)  | S(12)-Ge(11)-S(14)    | 111.71(4)  |
| S(4)-Ge(1)-S(3)       | 93.50(3)   | S(13)-Ge(11)-S(14)    | 93.60(3)   |
| S(6)-Ge(2)-S(5)       | 115.92(4)  | S(15)-Ge(12)-S(16)    | 115.66(4)  |
| S(6)-Ge(2)-S(4)       | 111.47(4)  | S(15)-Ge(12)-S(14)    | 114.01(4)  |
| S(5)-Ge(2)-S(4)       | 111.80(4)  | S(16)-Ge(12)-S(14)    | 111.14(4)  |
| S(6)-Ge(2)-S(3)       | 110.89(4)  | S(15)-Ge(12)-S(13)    | 111.04(4)  |
| S(5)-Ge(2)-S(3)       | 110.89(3)  | S(16)-Ge(12)-S(13)    | 109.50(4)  |
| S(4)-Ge(2)-S(3)       | 93.75(3)   | S(14)-Ge(12)-S(13)    | 93.23(3)   |
| Ge(2)-S(3)-Ge(1)      | 86.09(3)   | Ge(11)-S(13)-Ge(12)   | 86.44(3)   |
| Ge(1)-S(4)-Ge(2)      | 86.63(3)   | Ge(12)-S(14)-Ge(11)   | 86.57(3)   |
| Co(1)-N(2)            | 2.159(3)   | Co(1)-N(13)           | 2.168(3)   |
| Co(1)-N(3)            | 2.167(3)   | Co(1)-N(1)            | 2.173(3)   |
| Co(1)-N(12)           | 2.168(3)   | Co(1)-N(11)           | 2.188(3)   |
| N(2)-Co(1)-N(3)       | 81.45(11)  | N(12)-Co(1)-N(1)      | 99.61(12)  |
| N(2)-Co(1)-N(12)      | 179.56(12) | N(13)-Co(1)-N(1)      | 176.78(12) |
| N(3)-Co(1)-N(12)      | 98.59(12)  | N(2)-Co(1)-N(11)      | 99.81(12)  |
| N(2)-Co(1)-N(13)      | 99.17(11)  | N(3)-Co(1)-N(11)      | 175.67(12) |
| N(3)-Co(1)-N(13)      | 88.15(12)  | N(12)-Co(1)-N(11)     | 80.17(13)  |
| N(12)-Co(1)-N(13)     | 80.40(12)  | N(13)-Co(1)-N(11)     | 95.71(13)  |
| N(2)-Co(1)-N(1)       | 80.82(11)  | N(1)-Co(1)-N(11)      | 87.45(13)  |
| N(3)-Co(1)-N(1)       | 88.67(11)  |                       |            |
| Co(2)-N(22)           | 2.140(3)   | Co(3)-N(32)           | 2.141(3)   |
| Co(2)-N(22)#1         | 2.140(3)   | Co(3)-N(32)#2         | 2.141(3)   |
| Co(2)-N(21)           | 2.160(3)   | Co(3)-N(31)#2         | 2.165(3)   |
| Co(2)-N(21)#1         | 2.160(3)   | Co(3)-N(31)           | 2.165(3)   |
| Co(2)-N(23)#1         | 2.184(3)   | Co(3)-N(33)           | 2.197(3)   |
| Co(2)-N(23)           | 2.184(3)   | Co(3)-N(33)#2         | 2.197(3)   |
| N(22)-Co(2)-N(22)#1   | 180.000(1) | N(32)-Co(3)-N(32)#2   | 180.0      |
| N(22)-Co(2)-N(21)     | 81.81(11)  | N(32)-Co(3)-N(31)#2   | 98.05(12)  |
| N(22)#1-Co(2)-N(21)   | 98.19(11)  | N(32)#2-Co(3)-N(31)#2 | 81.95(12)  |
| N(22)-Co(2)-N(21)#1   | 98.19(11)  | N(32)-Co(3)-N(31)     | 81.95(12)  |
| N(22)#1-Co(2)-N(21)#1 | 81.81(11)  | N(32)#2-Co(3)-N(31)   | 98.05(12)  |
| N(21)-Co(2)-N(21)#1   | 180.0      | N(31)#2-Co(3)-N(31)   | 180.00(16) |
| N(22)-Co(2)-N(23)#1   | 98.60(11)  | N(32)-Co(3)-N(33)     | 80.64(11)  |
| N(22)#1-Co(2)-N(23)#1 | 81.40(11)  | N(32)#2-Co(3)-N(33)   | 99.36(11)  |
| N(21)-Co(2)-N(23)#1   | 89.60(11)  | N(31)#2-Co(3)-N(33)   | 88.91(11)  |
| N(21)#1-Co(2)-N(23)#1 | 90.40(11)  | N(31)-Co(3)-N(33)     | 91.09(11)  |
| N(22)-Co(2)-N(23)     | 81.40(11)  | N(32)-Co(3)-N(33)#2   | 99.36(11)  |
| N(22)#1-Co(2)-N(23)   | 98.60(11)  | N(32)#2-Co(3)-N(33)#2 | 80.64(11)  |
| N(21)-Co(2)-N(23)     | 90.40(11)  | N(31)#2-Co(3)-N(33)#2 | 91.09(11)  |
| N(21)#1-Co(2)-N(23)   | 89.60(11)  | N(31)-Co(3)-N(33)#2   | 88.91(11)  |
| N(23)#1-Co(2)-N(23)   | 180.00(17) | N(33)-Co(3)-N(33)#2   | 180.00(13) |

**Table S2.** Hydrogen bonds with  $H...A < r(A) + 2.000$  Angstroms and  $\langle DHA \rangle > 140^\circ$  for compound **1**.

| D-H         | d(D-H) | d(H..A) | $\langle DHA \rangle$ | d(D..A) | A                        |
|-------------|--------|---------|-----------------------|---------|--------------------------|
| N1-H1N      | 0.900  | 2.521   | 157.28                | 3.370   | S6 [ x+1, y-1, z ]       |
| N1-H2N      | 0.900  | 2.489   | 163.60                | 3.362   | S2 [ -x+1, -y+1, -z ]    |
| N2-H3N      | 0.910  | 2.826   | 144.65                | 3.606   | S4 [ -x, -y+1, -z ]      |
| N3-H4N      | 0.900  | 2.660   | 149.18                | 3.464   | S2 [ -x+1, -y+1, -z ]    |
| N3-H5N      | 0.900  | 2.536   | 148.89                | 3.339   | S1                       |
| N11-H7N     | 0.900  | 2.855   | 148.08                | 3.650   | S5 [ -x, -y+1, -z ]      |
| N12-H8N     | 0.910  | 2.778   | 147.06                | 3.576   | S1 [ -x+1, -y+1, -z ]    |
| N12-H8N     | 0.910  | 2.943   | 134.68                | 3.641   | S3 [ -x+1, -y+1, -z ]    |
| N13-H9N     | 0.900  | 2.826   | 165.53                | 3.704   | S5 [ -x, -y+1, -z ]      |
| N13-H10N    | 0.900  | 2.775   | 148.49                | 3.573   | S1                       |
| N21-H11N    | 0.900  | 2.854   | 147.29                | 3.644   | S15 [ -x, -y+1, -z+1 ]   |
| N21-H12N    | 0.900  | 2.547   | 147.81                | 3.343   | S11 [ -x+1, -y+1, -z+1 ] |
| N22-H13N    | 0.910  | 2.658   | 147.23                | 3.459   | S16 [ x+1, y, z ]        |
| N23-H14N    | 0.900  | 2.585   | 168.82                | 3.473   | S11                      |
| N23-H15N    | 0.900  | 2.876   | 148.12                | 3.671   | S15 [ -x, -y+1, -z+1 ]   |
| N31-H16N    | 0.900  | 2.624   | 149.93                | 3.433   | S12                      |
| N31-H17N    | 0.900  | 2.588   | 159.30                | 3.444   | S16 [ x+1, y, z ]        |
| N32-H18N    | 0.910  | 2.643   | 150.02                | 3.461   | S11 [ -x+1, -y, -z+1 ]   |
| N33-H19N    | 0.900  | 2.656   | 160.52                | 3.517   | S16 [ -x, -y, -z+1 ]     |
| N33-H20N    | 0.900  | 2.797   | 148.11                | 3.593   | S12                      |
| N41-H21N    | 0.890  | 2.445   | 159.39                | 3.293   | S6                       |
| N41-H22N    | 0.890  | 2.641   | 166.13                | 3.511   | S6 [ -x, -y+2, -z ]      |
| N41-H23N    | 0.890  | 2.442   | 177.65                | 3.332   | S2                       |
| N42-H24N    | 0.900  | 2.711   | 158.01                | 3.562   | S15 [ x, y+1, z-1 ]      |
| N43-H25N    | 0.890  | 1.995   | 163.29                | 2.859   | N53_a [ -x, -y+1, -z ]   |
| N43-H25N    | 0.890  | 2.107   | 169.67                | 2.987   | N53'_b [ -x, -y+1, -z ]  |
| N43-H26N    | 0.890  | 2.377   | 165.21                | 3.246   | S16 [ -x, -y+1, -z ]     |
| N43-H27N    | 0.890  | 2.380   | 169.34                | 3.258   | S12 [ -x, -y+1, -z ]     |
| N51-H28N    | 0.890  | 2.421   | 156.32                | 3.255   | S15 [ -x, -y+1, -z+1 ]   |
| N51-H29N    | 0.890  | 2.262   | 172.17                | 3.146   | S11 [ -x, -y+1, -z+1 ]   |
| N51-H30N    | 0.890  | 2.558   | 156.75                | 3.394   | S5                       |
| N52-H31N    | 0.900  | 2.340   | 174.69                | 3.237   | S5                       |
| N52-H32N    | 0.900  | 2.296   | 172.78                | 3.191   | S1                       |
| N53'-H33N   | 0.887  | 2.572   | 149.73                | 3.368   | S2 [ -x, -y+1, -z ]      |
| N53'-H35N_b | 0.890  | 2.538   | 170.16                | 3.419   | S4 [ -x, -y+1, -z ]      |

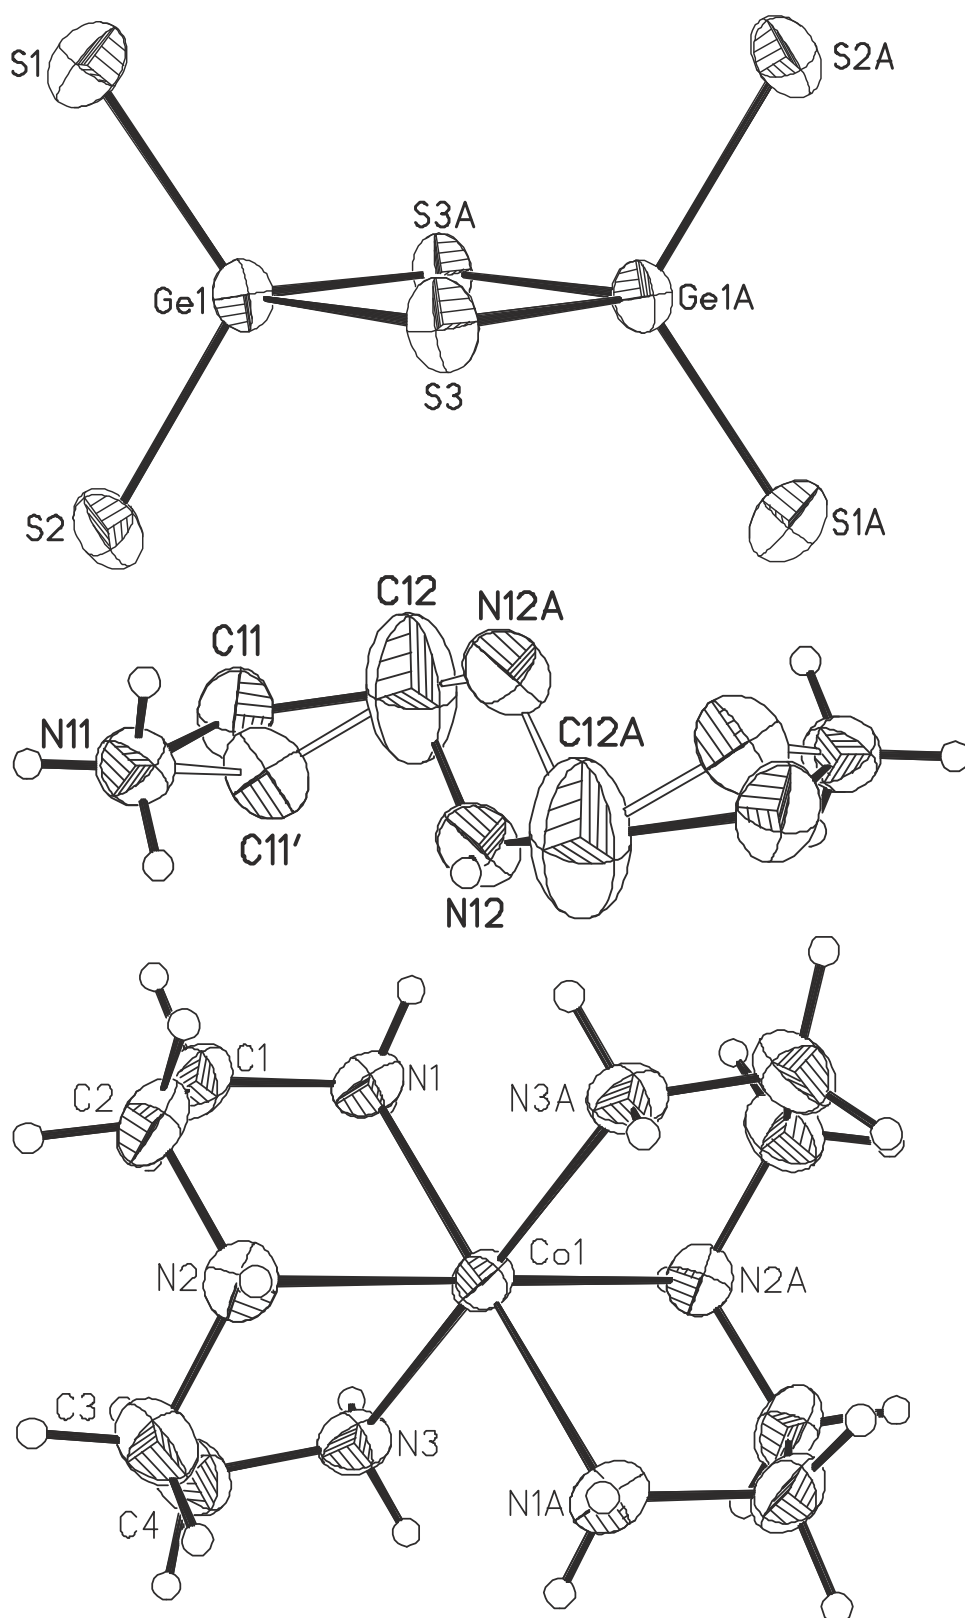

**Figure S2.** Part of the crystal structure of compound **2** with labeling and displacement ellipsoids drawn at the 50% probability level. Please note: For the uncoordinated amine molecules the C-H H atoms are omitted for clarity.

**Table S3.** Selected bond lengths [Å] and angles [°] for compound **2**. Symmetry transformations used to generate equivalent atoms: #1 -x+1,-y+1,-z+2  
#2 -x+1,-y+1,-z+1 #3 -x+2,-y,-z+2

|                     |            |                     |           |
|---------------------|------------|---------------------|-----------|
| Ge(1)-S(1)          | 2.1416(8)  | Ge(1)-S(3)          | 2.2762(7) |
| Ge(1)-S(2)          | 2.1572(7)  | Ge(1)-S(3)#1        | 2.2783(7) |
| S(1)-Ge(1)-S(2)     | 116.37(3)  | S(1)-Ge(1)-S(3)#1   | 112.05(3) |
| S(1)-Ge(1)-S(3)     | 112.35(3)  | S(2)-Ge(1)-S(3)#1   | 110.02(3) |
| S(2)-Ge(1)-S(3)     | 110.11(3)  | S(3)-Ge(1)-S(3)#1   | 93.68(2)  |
| Co(1)-N(3)          | 2.153(2)   | Co(1)-N(2)          | 2.163(2)  |
| Co(1)-N(3)#2        | 2.153(2)   | Co(1)-N(1)#2        | 2.188(2)  |
| Co(1)-N(2)#2        | 2.163(2)   | Co(1)-N(1)          | 2.188(2)  |
| N(3)-Co(1)-N(3)#2   | 180.000(1) | N(2)#2-Co(1)-N(1)#2 | 81.16(9)  |
| N(3)-Co(1)-N(2)#2   | 99.45(9)   | N(2)-Co(1)-N(1)#2   | 98.84(9)  |
| N(3)#2-Co(1)-N(2)#2 | 80.55(9)   | N(3)-Co(1)-N(1)     | 90.59(9)  |
| N(3)-Co(1)-N(2)     | 80.55(9)   | N(3)#2-Co(1)-N(1)   | 89.41(9)  |
| N(3)#2-Co(1)-N(2)   | 99.45(9)   | N(2)#2-Co(1)-N(1)   | 98.84(9)  |
| N(2)#2-Co(1)-N(2)   | 180.00(10) | N(2)-Co(1)-N(1)     | 81.16(9)  |
| N(3)-Co(1)-N(1)#2   | 89.41(9)   | N(1)#2-Co(1)-N(1)   | 180.0     |
| N(3)#2-Co(1)-N(1)#2 | 90.59(9)   |                     |           |

**Table S4.** Hydrogen bonds with  $H..A < r(A) + 2.000$  Angstroms and  $\langle DHA \rangle > 140^\circ$  for compound **2**.

| D-H     | d(D-H) | d(H..A) | $\langle DHA \rangle$ | d(D..A) | A                       |
|---------|--------|---------|-----------------------|---------|-------------------------|
| N1-H1N  | 0.900  | 2.868   | 145.76                | 3.647   | S2 [ x-1, y, z ]        |
| N2-H3N  | 0.910  | 2.673   | 145.49                | 3.461   | S3                      |
| N3-H4N  | 0.900  | 2.458   | 163.71                | 3.331   | S1 [ -x+1, -y+1, -z+1 ] |
| N3-H5N  | 0.900  | 2.449   | 175.19                | 3.347   | S2 [ -x+2, -y+1, -z+1 ] |
| N11-H6N | 0.900  | 2.496   | 173.39                | 3.392   | S1 [ -x+1, -y+1, -z+2 ] |
| N11-H7N | 0.900  | 2.430   | 166.13                | 3.311   | S2                      |
| N11-H8N | 0.900  | 2.692   | 175.56                | 3.590   | S2 [ -x+2, -y+1, -z+2 ] |

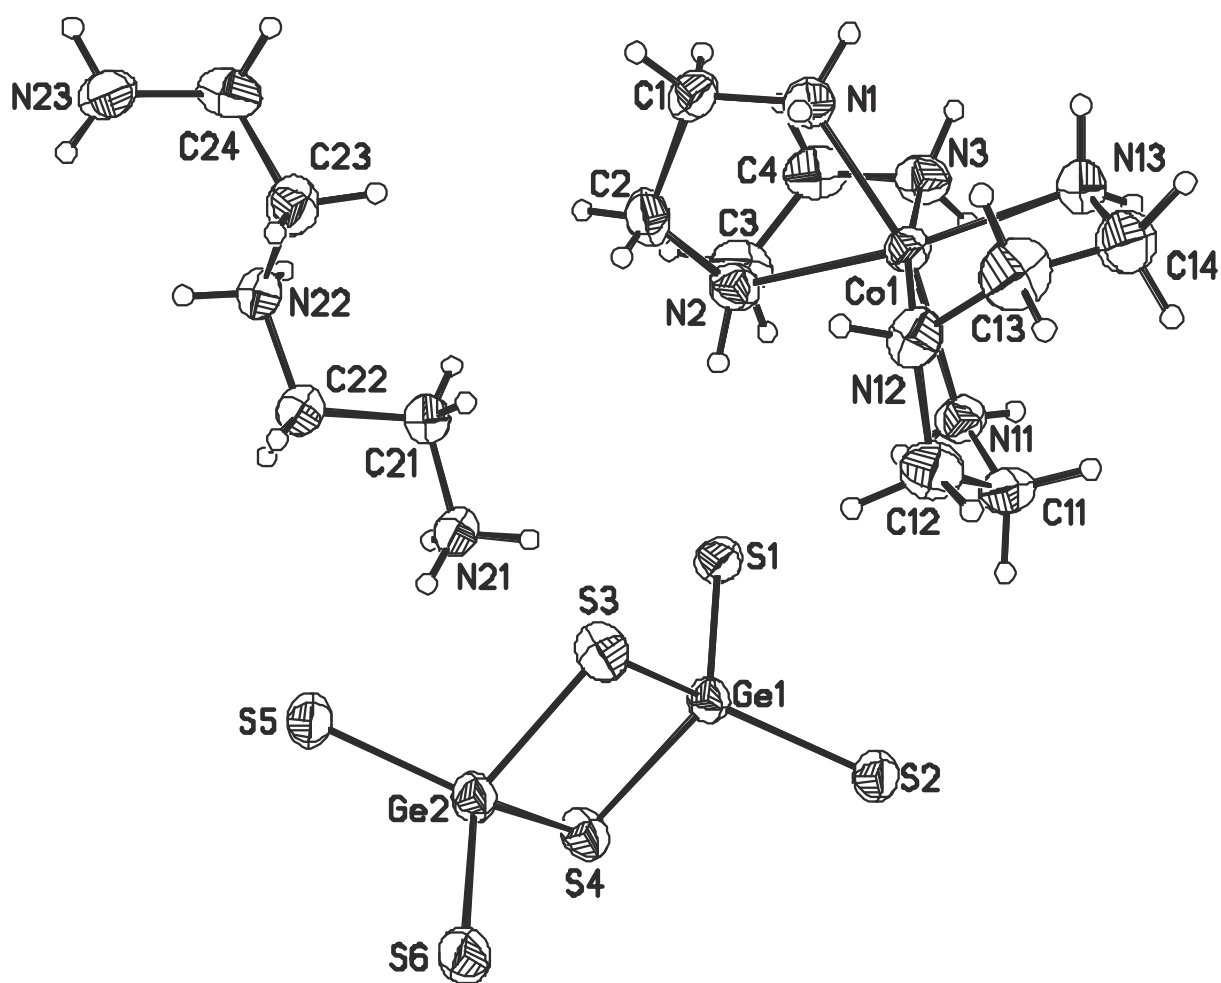

**Figure S3.** Part of the crystal structure of compound **3** with labeling and displacement ellipsoids drawn at the 50% probability level.

**Table S5.** Selected bond lengths [ $\text{\AA}$ ] and angles [ $^\circ$ ] for compound **3**.

|                   |            |                   |            |
|-------------------|------------|-------------------|------------|
| Ge(1)-S(2)        | 2.1608(10) | Ge(2)-S(5)        | 2.1522(10) |
| Ge(1)-S(1)        | 2.1621(10) | Ge(2)-S(6)        | 2.1714(10) |
| Ge(1)-S(3)        | 2.2664(10) | Ge(2)-S(4)        | 2.2797(11) |
| Ge(1)-S(4)        | 2.2701(10) | Ge(2)-S(3)        | 2.2878(11) |
| S(2)-Ge(1)-S(1)   | 113.18(4)  | S(5)-Ge(2)-S(6)   | 115.70(4)  |
| S(2)-Ge(1)-S(3)   | 113.09(4)  | S(5)-Ge(2)-S(4)   | 113.09(4)  |
| S(1)-Ge(1)-S(3)   | 110.48(4)  | S(6)-Ge(2)-S(4)   | 111.53(4)  |
| S(2)-Ge(1)-S(4)   | 110.99(4)  | S(5)-Ge(2)-S(3)   | 110.03(4)  |
| S(1)-Ge(1)-S(4)   | 114.14(4)  | S(6)-Ge(2)-S(3)   | 111.56(4)  |
| S(3)-Ge(1)-S(4)   | 93.48(4)   | S(4)-Ge(2)-S(3)   | 92.66(4)   |
| Ge(1)-S(3)-Ge(2)  | 86.86(4)   | Ge(1)-S(4)-Ge(2)  | 86.97(4)   |
| Co(1)-N(3)        | 2.139(3)   | Co(1)-N(1)        | 2.155(3)   |
| Co(1)-N(11)       | 2.145(3)   | Co(1)-N(12)       | 2.205(3)   |
| Co(1)-N(13)       | 2.150(3)   | Co(1)-N(2)        | 2.210(3)   |
| N(3)-Co(1)-N(11)  | 95.12(13)  | N(13)-Co(1)-N(12) | 80.31(13)  |
| N(3)-Co(1)-N(13)  | 94.40(13)  | N(1)-Co(1)-N(12)  | 88.68(12)  |
| N(11)-Co(1)-N(13) | 96.22(13)  | N(3)-Co(1)-N(2)   | 80.44(12)  |
| N(3)-Co(1)-N(1)   | 97.21(13)  | N(11)-Co(1)-N(2)  | 89.68(12)  |
| N(11)-Co(1)-N(1)  | 162.35(13) | N(13)-Co(1)-N(2)  | 172.51(13) |
| N(13)-Co(1)-N(1)  | 95.37(12)  | N(1)-Co(1)-N(2)   | 80.01(12)  |
| N(3)-Co(1)-N(12)  | 172.46(13) | N(12)-Co(1)-N(2)  | 105.32(12) |
| N(11)-Co(1)-N(12) | 80.22(12)  |                   |            |

**Table S6.** Hydrogen bonds with  $H..A < r(A) + 2.000$  Angstroms and  $\langle DHA \rangle > 140^\circ$  for compound **3**.

| D-H      | d(D-H) | d(H..A) | $\langle DHA \rangle$ | d(D..A) | A                          |
|----------|--------|---------|-----------------------|---------|----------------------------|
| N1-H1N   | 0.900  | 2.699   | 161.51                | 3.564   | S6 [ x-1/2, y, -z+3/2 ]    |
| N1-H2N   | 0.900  | 2.751   | 141.08                | 3.498   | S2 [ x-1/2, -y+3/2, -z+1 ] |
| N2-H3N   | 0.910  | 2.743   | 142.36                | 3.508   | S1                         |
| N3-H4N   | 0.900  | 2.677   | 142.56                | 3.436   | S2 [ x-1/2, -y+3/2, -z+1 ] |
| N3-H5N   | 0.900  | 2.656   | 159.02                | 3.511   | S6 [ x, -y+3/2, z-1/2 ]    |
| N11-H6N  | 0.900  | 2.753   | 175.59                | 3.651   | S1                         |
| N11-H7N  | 0.900  | 2.741   | 142.58                | 3.498   | S5 [ x, -y+3/2, z-1/2 ]    |
| N13-H9N  | 0.900  | 2.737   | 151.41                | 3.554   | S5 [ x, -y+3/2, z-1/2 ]    |
| N13-H10N | 0.900  | 2.633   | 155.27                | 3.471   | S1 [ x-1/2, -y+3/2, -z+1 ] |
| N21-H11N | 0.890  | 2.357   | 168.04                | 3.233   | S5                         |
| N21-H12N | 0.890  | 2.327   | 177.77                | 3.216   | S1                         |
| N21-H13N | 0.890  | 1.917   | 171.22                | 2.800   | N23 [ x+1/2, y, -z+3/2 ]   |
| N22-H14N | 0.900  | 2.240   | 164.98                | 3.118   | S2 [ -x+1, y-1/2, -z+3/2 ] |
| N22-H15N | 0.900  | 2.340   | 169.69                | 3.230   | S6 [ -x+1, y-1/2, -z+3/2 ] |
| N23-H16N | 0.890  | 2.585   | 164.34                | 3.451   | S2 [ -x+1, y-1/2, -z+3/2 ] |
| N23-H17N | 0.890  | 2.577   | 171.27                | 3.459   | S3 [ -x+1/2, y-1/2, z ]    |



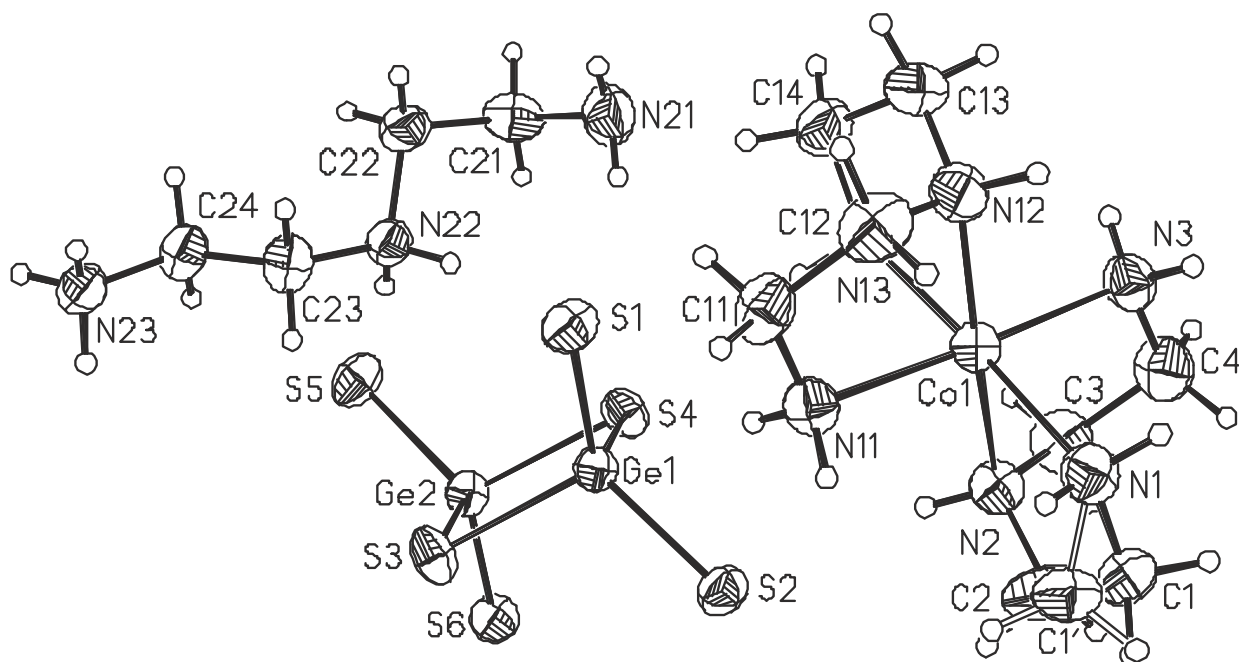

**Figure S4.** Part of the crystal structure of compound **4** with labeling and displacement ellipsoids drawn at the 50% probability level.

**Table S7.** Selected bond lengths [ $\text{\AA}$ ] and angles [ $^\circ$ ] for compound **4**.

|                   |           |                   |           |
|-------------------|-----------|-------------------|-----------|
| Ge(1)-S(1)        | 2.1592(7) | Ge(2)-S(5)        | 2.1519(7) |
| Ge(1)-S(2)        | 2.1604(7) | Ge(2)-S(6)        | 2.1570(7) |
| Ge(1)-S(3)        | 2.2694(6) | Ge(2)-S(3)        | 2.2822(7) |
| Ge(1)-S(4)        | 2.2737(7) | Ge(2)-S(4)        | 2.2975(7) |
| S(1)-Ge(1)-S(2)   | 113.12(3) | S(5)-Ge(2)-S(6)   | 115.18(3) |
| S(1)-Ge(1)-S(3)   | 112.45(3) | S(5)-Ge(2)-S(3)   | 113.25(3) |
| S(2)-Ge(1)-S(3)   | 111.18(3) | S(6)-Ge(2)-S(3)   | 111.77(3) |
| S(1)-Ge(1)-S(4)   | 112.51(3) | S(5)-Ge(2)-S(4)   | 110.84(3) |
| S(2)-Ge(1)-S(4)   | 112.88(3) | S(6)-Ge(2)-S(4)   | 111.39(3) |
| S(3)-Ge(1)-S(4)   | 93.16(2)  | S(3)-Ge(2)-S(4)   | 92.20(2)  |
| Ge(1)-S(3)-Ge(2)  | 87.55(2)  | Ge(1)-S(4)-Ge(2)  | 87.07(2)  |
| Co(1)-N(12)       | 2.132(2)  | Co(1)-N(3)        | 2.183(2)  |
| Co(1)-N(2)        | 2.146(2)  | Co(1)-N(13)       | 2.194(2)  |
| Co(1)-N(11)       | 2.178(2)  | Co(1)-N(1)        | 2.196(2)  |
| N(12)-Co(1)-N(2)  | 177.86(9) | N(11)-Co(1)-N(13) | 88.62(9)  |
| N(12)-Co(1)-N(11) | 81.14(9)  | N(3)-Co(1)-N(13)  | 89.41(9)  |
| N(2)-Co(1)-N(11)  | 100.99(9) | N(12)-Co(1)-N(1)  | 100.03(9) |
| N(12)-Co(1)-N(3)  | 97.22(9)  | N(2)-Co(1)-N(1)   | 80.19(9)  |
| N(2)-Co(1)-N(3)   | 80.64(9)  | N(11)-Co(1)-N(1)  | 88.95(9)  |
| N(11)-Co(1)-N(3)  | 177.62(9) | N(3)-Co(1)-N(1)   | 93.06(9)  |
| N(12)-Co(1)-N(13) | 81.17(10) | N(13)-Co(1)-N(1)  | 177.09(9) |
| N(2)-Co(1)-N(13)  | 98.71(9)  |                   |           |

**Table S8.** Hydrogen bonds with  $H..A < r(A) + 2.000$  Angstroms and  $\langle DHA \rangle > 140^\circ$  for compound **4**.

| D-H       | d(D-H) | d(H..A) | $\langle DHA \rangle$ | d(D..A) | A                        |
|-----------|--------|---------|-----------------------|---------|--------------------------|
| N1-H1N_a  | 0.900  | 2.873   | 142.14                | 3.626   | S5 [ -x+1, -y+1, z-1/2 ] |
| N1-H2N_a  | 0.900  | 2.822   | 164.38                | 3.696   | S6 [ -x+1/2, y, z-1/2 ]  |
| N1-H1NA_b | 0.900  | 2.729   | 174.29                | 3.626   | S5 [ -x+1, -y+1, z-1/2 ] |
| N2-H3N    | 0.910  | 2.550   | 157.38                | 3.408   | S2                       |
| N3-H4N    | 0.900  | 2.725   | 167.66                | 3.609   | S2 [ x+1/2, -y+1, z ]    |
| N3-H5N    | 0.900  | 2.891   | 144.60                | 3.662   | S5 [ -x+1, -y+1, z-1/2 ] |
| N11-H6N   | 0.900  | 2.771   | 144.04                | 3.539   | S1                       |
| N11-H7N   | 0.900  | 2.541   | 157.89                | 3.392   | S6 [ -x+1/2, y, z-1/2 ]  |
| N12-H8N   | 0.910  | 2.549   | 156.77                | 3.405   | S6 [ -x+1, -y+1, z-1/2 ] |
| N13-H9N   | 0.900  | 2.637   | 144.39                | 3.409   | S2 [ x+1/2, -y+1, z ]    |
| N13-H10N  | 0.900  | 2.753   | 144.09                | 3.521   | S1                       |
| N21-H12N  | 0.900  | 2.646   | 155.30                | 3.484   | S1                       |
| N22-H13N  | 0.900  | 2.275   | 161.18                | 3.141   | S1                       |
| N22-H14N  | 0.900  | 2.307   | 173.34                | 3.203   | S5                       |
| N23-H15N  | 0.890  | 1.944   | 168.38                | 2.822   | N21 [ x-1/2, -y, z ]     |
| N23-H16N  | 0.890  | 2.327   | 155.90                | 3.161   | S6 [ x, y-1, z ]         |
| N23-H17N  | 0.890  | 2.374   | 170.16                | 3.255   | S2 [ x, y-1, z ]         |
